# Supplementary material
Source: PubMed Central journal article supplement (PMC3281628)
Supplement: supp_C111.291518_jbc.C111.291518-1.pdf [file supp_C111.291518_jbc.C111.291518-1.pdf]

## Supplementary Materials

Supplementary Methods. Expanded description of methods not included in the main manuscript text due to space limitations.

Supplementary Table 1. Proteins associated with FLAG-MTDH were identified by MS.

Supplementary Table 2. mRNAs pull-down by MTDH antibody from Hec50 cells without BEZ 235 treatment were identified by RNA-IP and micro-array.

Supplementary Table 3. BEZ 235 decreases specific mRNAs pulled-down by MTDH antibody identified by RNA-IP and micro-array.

Supplementary Table 4. BEZ 235 increases specific mRNAs pulled-down by MTDH antibody identified by RNA-IP and micro-array.

Supplementary Table 5. Novel mRNAs pulled-down by MTDH antibody were identified by RNA-IP and micro-array from Hec50 cells treated with 100nM BEZ 235.

Supplementary Figure 1. Sub-cellular distribution of MTDH was detected by immuno-staining in endometrial cancer cell lines AN3CA, ECC1, Hec1A, and RL95, and ovarian cancer cell lines PA-1 and SKOV3.

Supplementary Figure 2. Sub-cellular localization of MTDH was detected by different MTDH antibodies.

Supplementary Figure 3. Mutation of kinase phosphorylation sites in MTDH did not alter MTDH sub-cellular distribution.

Supplementary Figure 4. Substitution of kinase phosphorylation sites to alanine in MTDH did not disrupt MTDH association with cytoplasmic proteins SND1 and RPL4.

Supplementary Figure 5. Heat shock did not alter protein expression of MTDH.

Supplementary Figure 6. MTDH is homologous to leucyl- tRNA synthetase. BLAST was used to identify regions of MTDH that possessed homology with other proteins.

Supplementary Figure 7. Putative RNA binding sites were identified in MTDH by three bioinformatics analysis on-line service.

Supplementary Figure 8. Effect of exogenous expression of MTDH on nuclear accumulation of Rad51 in MTDH depleted cells.

## Supplementary Materials

*Immunostaining*—Sub-cellular distribution of endogenous and exogenous MTDH and exogenous MTDH fragments in Hec50 cells was detected by microscopy and electron-microscope using a rabbit antibody against MTDH (a.a. 315-461, Sigma) or FLAG antibody (Sigma). For confocal imaging, nuclei were stained with DAPI (Vector Laboratories). For co-localization studies, cells were co-stained with primary antibodies against MTDH (rabbit) and RPL4 (mouse, Sigma) followed by Alexa Fluor 546-conjugated anti-rabbit and Alexa Fluor 488-conjugated anti-mouse secondary antibodies, then visualized by confocal microscopy.

*Establishment of FLAG-MTDH stable cell lines*—First, shRNA binding sites (1) were mutated by site-directed mutagenesis without altering the amino acid sequence of MTDH. FLAG-MTDH stable Hec50 cell lines were generated, and then MTDH shRNA was stably expressed as previously described (1) to deplete endogenous MTDH.

*MTDH protein co-immunoprecipitation assays*—Cell lysates from Hec50-FLAG-MTDH (with mutated shRNA binding site) transfected with MTDH shRNA or parental Hec50 cells were subjected to immunoprecipitation (IP) using agarose conjugated with anti-FLAG antibody (anti-FLAG agarose, Sigma). IPs were eluted using 3xFLAG peptide and separated by SDS-PAGE. The gel was stained with Coomassie blue and five stained bands, which were present only in Hec50-FLAG MTDH IPs but not in Hec50 IPs, were cut and subjected to liquid chromatography tandem mass spectrometry (LC-MS/MS) analysis after in-gel trypsin digestion. For validation, lysates were IPd with control IgG or MTDH antibody, then blotted with anti-RPL4, SND1, or NPM1 (Sigma). The reciprocal was performed using anti-SND1, anti-RPL4, and anti-NPM1 antibodies for IP followed by immunoblotting with anti-FLAG. Where indicated, lysates were treated with benzonase nuclease (50 U/ml, EMD) prior to and during immunoprecipitation (IP).

## Reference for Supplementary Materials

1. Meng, X., Brachova, P., Yang, S., Xiong, Z., Zhang, Y., Thiel, K. W., and Leslie, K. K. (2011) *PLoS One* **6**, e20920

Supplementary Table 1. Proteins associated with FLAG-MTDH were identified by MS.

| Identified MTDH associated Proteins                                   | Accession Number   | band 1 Hi | band 2 hit | band3 hit | band4 hit | band5 hit | Total hit |
|-----------------------------------------------------------------------|--------------------|-----------|------------|-----------|-----------|-----------|-----------|
| EBNA-2 co-activator variant                                           | Q59FF0_HUMAN       | 90        | 304        | 9         | 0         | 0         | 403       |
| Nucleophosmin (Nucleolar phosphoprotein B23, numatrin)                | D3DQL6_HUMAN       | 0         | 0          | 0         | 121       | 2         | 123       |
| Ribosomal protein L4 variant                                          | Q59GY2_HUMAN (+1)  | 0         | 0          | 70        | 7         | 0         | 77        |
| 60S ribosomal protein L6                                              | Q8N5Z7_HUMAN (+3)  | 0         | 0          | 0         | 23        | 43        | 66        |
| Protein LYRIC, MTDH, AEG-1                                            | LYRIC_HUMAN        | 4         | 0          | 14        | 19        | 12        | 49        |
| Serum albumin                                                         | ALBU_BOVIN (+1)    | 11        | 10         | 9         | 11        | 5         | 46        |
| Elongation factor 1-alpha 1                                           | EF1A1_HUMAN (+7)   | 0         | 0          | 24        | 7         | 5         | 36        |
| cDNA FLJ10452 fis, clone NT2RP1000966, highly similar to NUCLEOL      | B3KM80_HUMAN (+3)  | 0         | 0          | 20        | 4         | 4         | 28        |
| Ig gamma-1 chain C region,                                            | IGH1M_MOUSE (+2)   | 3         | 3          | 5         | 6         | 11        | 28        |
| Annexin A2                                                            | ANXA2_HUMAN        | 0         | 0          | 0         | 0         | 26        | 26        |
| Putative uncharacterized protein DBN1                                 | A8MV58_HUMAN (+1)  | 0         | 19         | 2         | 0         | 0         | 21        |
| GIG35                                                                 | Q53YD7_HUMAN       | 0         | 0          | 21        | 0         | 0         | 21        |
| Ribosome production factor 2 homolog                                  | RPF2_HUMAN         | 0         | 0          | 0         | 0         | 21        | 21        |
| rRNA 2'-O-methyltransferase fibrillarin                               | FBRL_HUMAN (+1)    | 0         | 0          | 0         | 0         | 19        | 19        |
| AP-2 complex subunit alpha-1                                          | AP2A1_HUMAN        | 0         | 18         | 0         | 0         | 0         | 18        |
| cDNA FLJ54371, highly similar to Serum albumin                        | B4DPP6_HUMAN       | 2         | 3          | 3         | 12        | 2         | 22        |
| Ribosomal protein L5                                                  | A2RUM7_HUMAN (+2)  | 0         | 0          | 0         | 0         | 17        | 17        |
| Eukaryotic translation initiation factor 2 subunit 2                  | IF2B_HUMAN (+1)    | 0         | 0          | 16        | 0         | 0         | 16        |
| Mc5 VLCL (Fragment)                                                   | AON7J3_9MURI       | 0         | 0          | 3         | 5         | 7         | 15        |
| Tubulin beta-7 chain                                                  | B7ZAF0_HUMAN (+5)  | 0         | 0          | 15        | 0         | 0         | 15        |
| Eukaryotic translation initiation factor 2 subunit 1                  | IF2A_HUMAN (+1)    | 0         | 0          | 0         | 14        | 0         | 14        |
| Phosphoribosyl pyrophosphate synthase-associated protein 1 1          | KPRA_HUMAN         | 0         | 0          | 0         | 14        | 0         | 14        |
| cDNA FLJ7549, highly similar to Homo sapiens ribosomal protein,       | A8K4Z4_HUMAN (+1)  | 0         | 0          | 0         | 5         | 8         | 13        |
| Nuclease-sensitive element-binding protein 1                          | YBOX1_HUMAN        | 0         | 0          | 13        | 0         | 0         | 13        |
| Heterogeneous nuclear ribonucleoprotein A3, isoform CRA_a             | B4DD86_HUMAN (+4)  | 0         | 0          | 0         | 12        | 0         | 12        |
| cDNA, FLJ93570, highly similar to Homo sapiens phosphoribosyl py      | B2R7R5_HUMAN (+1)  | 0         | 0          | 0         | 19        | 0         | 19        |
| RNA binding protein, autoantigenic (HnRNP-associated with lethal      | Q5QPL9_HUMAN       | 0         | 0          | 0         | 11        | 0         | 11        |
| Putative uncharacterized protein NOP2                                 | A8MQ38_HUMAN (+2)  | 0         | 11         | 0         | 0         | 0         | 11        |
| cDNA FLJ78244, highly similar to Homo sapiens eukaryotic translati    | A8K7F6_HUMAN (+2)  | 0         | 0          | 10        | 0         | 0         | 10        |
| 52 kDa Ro protein                                                     | RO52_HUMAN         | 0         | 0          | 10        | 0         | 0         | 10        |
| Major allergen beta-lactoglobulin                                     | B5B0D4_BOVIN       | 10        | 0          | 0         | 0         | 0         | 10        |
| cDNA FLJ78733, highly similar to Homo sapiens adaptor-related pro     | A8K0G3_HUMAN (+4)  | 0         | 9          | 0         | 0         | 0         | 9         |
| Aminoacyl tRNA synthetase complex-interacting multifunctional p       | AIMP2_HUMAN (+1)   | 0         | 0          | 0         | 8         | 0         | 8         |
| cDNA FLJ58286, highly similar to Actin, cytoplasmic 2                 | B4DVQ0_HUMAN (+7)  | 0         | 0          | 2         | 0         | 6         | 8         |
| Alpha S1 casein                                                       | B5B3R8_BOVIN (+1)  | 8         | 0          | 0         | 0         | 0         | 8         |
| CDW7/WDR12                                                            | Q53T99_HUMAN (+1)  | 0         | 0          | 7         | 0         | 0         | 7         |
| Heterogeneous nuclear ribonucleoprotein A1                            | Q0VACO_HUMAN       | 0         | 0          | 0         | 0         | 7         | 7         |
| cDNA FLJ78587                                                         | A8JZY9_HUMAN (+15) | 0         | 0          | 6         | 0         | 0         | 6         |
| cDNA FLJ51625, highly similar to Ubiquinol-cytochrome-c reductas      | B4DUL5_HUMAN (+1)  | 0         | 0          | 6         | 0         | 0         | 6         |
| cDNA FLJ60713, highly similar to Homo sapiens heterogeneous nuc       | B4DMY3_HUMAN (+3)  | 0         | 0          | 0         | 6         | 0         | 6         |
| Serine/threonine-protein phosphatase                                  | B3KXM2_HUMAN (+4)  | 0         | 0          | 0         | 5         | 0         | 5         |
| Heat shock 70 kDa protein 4                                           | B4DH02_HUMAN (+1)  | 0         | 5          | 0         | 0         | 0         | 5         |
| Major vault protein (may act as scaffolds for proteins involved in si | B4DXN0_HUMAN (+1)  | 0         | 5          | 0         | 0         | 0         | 5         |
| Transcriptional activator protein Pur-beta                            | PURB_HUMAN         | 0         | 0          | 0         | 5         | 0         | 5         |
| cDNA FLJ39996 fis, clone STOMA2002166, highly similar to Splicing     | B3KUJ0_HUMAN (+4)  | 0         | 0          | 5         | 0         | 0         | 5         |
| If kappa light chain (Fragment)                                       | A2NHM3_MOUSE (+3)  | 0         | 0          | 0         | 6         | 6         | 12        |
| Heterogeneous nuclear ribonucleoprotein F                             | B4DKS8_HUMAN (+3)  | 0         | 0          | 4         | 0         | 0         | 4         |
| Butyrophilin subfamily 1 member A1                                    | BT1A1_HUMAN (+2)   | 4         | 0          | 0         | 0         | 0         | 4         |
| Heterogeneous nuclear ribonucleoprotein A0                            | ROA0_HUMAN         | 0         | 0          | 0         | 0         | 4         | 4         |
| 39S ribosomal protein L44, mitochondrial                              | RM44_HUMAN         | 0         | 0          | 0         | 0         | 4         | 4         |
| Ribosomal protein L14,                                                | A8K7N0_HUMAN       | 0         | 0          | 0         | 2         | 2         | 4         |
| Sperm-associated antigen 10 (Protein HP47).                           | P783Z8_HUMAN       | 4         | 0          | 0         | 0         | 0         | 4         |
| Putative uncharacterized protein HNRNPA2B1                            | B8ZZ37_HUMAN (+1)  | 0         | 0          | 0         | 0         | 3         | 3         |
| cDNA FLJ77432, highly similar to Homo sapiens poly(rC) binding pr     | A8K7X6_HUMAN (+7)  | 0         | 0          | 0         | 3         | 0         | 3         |
| CDW11/WDR57                                                           | A0MNP2_HUMAN (+3)  | 0         | 0          | 0         | 2         | 0         | 2         |
| cDNA FLJ44920 fis, clone BRAMY3011501, highly similar to Heteroge     | B3KX72_HUMAN (+5)  | 2         | 0          | 0         | 0         | 0         | 2         |
| Putative uncharacterized protein RCC1                                 | C9J3R0_HUMAN (+8)  | 0         | 0          | 2         | 0         | 0         | 2         |
| Leucine rich repeat containing 59, isoform CRA_                       | D3DTX8_HUMAN (+1)  | 0         | 0          | 0         | 0         | 2         | 2         |
| Alpha-enolase                                                         | ENOA_HUMAN         | 0         | 0          | 2         | 0         | 0         | 2         |
| Translocase of inner mitochondrial membrane 50 homolog                | Q0VAB1_HUMAN       | 0         | 0          | 0         | 2         | 0         | 2         |
| Splicing factor, arginine/serine-rich 5 variant (Fragment)            | Q59EK7_HUMAN (+1)  | 0         | 0          | 0         | 2         | 0         | 2         |
| Topoisomerase (DNA)                                                   | B9EG90_HUMAN (+1)  | 0         | 2          | 0         | 0         | 0         | 2         |
| Elongation factor Tu, mitochondrial                                   | EFTU_HUMAN         | 0         | 0          | 0         | 2         | 0         | 2         |
| Staphylococcal nuclease domain-containing protein 1                   | SND1_HUMAN         | 57        | 0          | 0         | 0         | 0         | 57        |
| cDNA, FLJ94025, highly similar to Homo sapiens tripartite motif-co    | B2R8R5_HUMAN       | 0         | 2          | 0         | 0         | 0         | 2         |

Supplementary Table 2. mRNAs pulled-down by MTDH antibody from Hec50 cells without BEZ 235 treatment were identified by RNA-IP and micro-array.

| Gene Symbol | Ratio(MTDH vs. IgG) |
|-------------|---------------------|
| CD109       | 7.00752             |
| EML1        | 6.92845             |
| PDCD11      | 6.76481             |
| ABCA12      | 6.53697             |
| ELN         | 6.48163             |
| ATRN        | 6.43971             |
| NPC1        | 6.41534             |
| NUP210      | 6.08822             |
| TACR2       | 5.95146             |
| PCCB        | 5.91637             |
| RGS13       | 5.71245             |
| EML1        | 5.65916             |
| PCDH7       | 5.64802             |
| GLG1        | 5.63337             |
| FASN        | 5.62332             |
| ANKRD13D    | 5.50822             |
| KDM6A       | 5.44271             |
| OGT         | 5.43334             |
| FANCI       | 5.34351             |
| BCS1L       | 5.29098             |
| NEO1        | 5.22842             |
| CCL20       | 5.11139             |
| SIAE        | 5.08112             |
| EPT1        | 5.02396             |
| OSMR        | 5.00977             |

Supplementary Table 3. Association of MTDH with select mRNAs is decreased with BEZ 235 (shown are mRNAs pulled-down by MTDH antibody from BEZ-treated cells).

| Gene Symbol | MTDH IP (BEZ235/CON) |          |          |          |          |
|-------------|----------------------|----------|----------|----------|----------|
|             |                      | E2F8     | -5.60501 | BUB1     | -2.89757 |
|             |                      | EPT1     | -5.60175 | RNF168   | -2.88119 |
|             |                      | GNB4     | -5.59059 | MRE11A   | -2.87161 |
| WHSC1L1     | -10.7984             | GORASP1  | -5.58087 | HDAC8    | -2.86757 |
| TFRC        | -8.85908             | UBE2E1   | -5.57845 | RASA2    | -2.86034 |
| PTPRD       | -8.5142              | GATS     | -5.55212 | RAD18    | -2.85759 |
| PCDH15      | -8.30018             | C12orf43 | -5.54671 | KLHL13   | -2.78522 |
| LMNB1       | -8.23591             | DEPDC1   | -5.54234 | APAF1    | -2.76614 |
| VPS13A      | -8.19292             | SLC4A7   | -5.47148 | DDX21    | -2.75191 |
| POLQ        | -8.15895             | POLQ     | -5.35422 | FANCD2   | -2.69716 |
| TACR2       | -7.67065             | PLCE1    | -5.33904 | FNDC3A   | -2.68101 |
| SLCO1B3     | -7.57798             | LIMCH1   | -5.32107 | AURKA    | -2.67645 |
| MMP16       | -7.52976             | AEBP2    | -5.30501 | PPP2R1B  | -2.67156 |
| MAP3K2      | -7.31467             | C2CD3    | -5.305   | FBXW2    | -2.66226 |
| SESN3       | -7.27753             | KIF14    | -5.23366 | CHD1     | -2.65239 |
| ARNTL       | -7.24666             | HEATR5A  | -5.21911 | MDM2     | -2.64047 |
| SLC7A11     | -7.16277             | FAM72A   | -5.21888 | CENPL    | -2.62219 |
| VPS45       | -7.02886             | FER      | -5.21436 | RAPGEF5  | -2.6148  |
| EPT1        | -6.79868             | BCS1L    | -5.18244 | SOX6     | -2.61104 |
| ASNS        | -6.7549              | UNKL     | -5.18063 | TOR1AIP2 | -2.5847  |
| CENPK       | -6.5074              | EGF      | -5.17439 | GPR111   | -2.57092 |
| ISG20L2     | -6.48759             | GBE1     | -5.15837 | RAD54B   | -2.56937 |
| GCNT2       | -6.36049             | MAGOHB   | -5.13412 | WWP1     | -2.56054 |
| ZNF271      | -6.35852             | ZNF431   | -5.13284 | WDR7     | -2.53623 |
| DDX6        | -6.35387             | ASNS     | -5.1291  | PPP2R1B  | -2.53387 |
| GPD1L       | -6.21163             | SESN3    | -5.11394 |          |          |
| CALML4      | -6.07633             | GAN      | -5.093   |          |          |
| GGH         | -6.00909             | FBN2     | -5.06198 |          |          |
| RAB8B       | -6.00786             | OR1L4    | -5.0556  |          |          |
| CA5B        | -6.00749             | VAV3     | -5.04449 |          |          |
| KLKB1       | -5.95345             | PLCE1    | -5.02442 |          |          |
| ARNTL       | -5.92487             | CDC7     | -5.0231  |          |          |
| IQCG        | -5.87833             | DDIT4    | -4.11335 |          |          |
| RWDD3       | -5.86385             | FANCC    | -3.57742 |          |          |
| SGK2        | -5.83207             | PPP2R1B  | -3.15464 |          |          |
| EXOSC8      | -5.7774              | FANCA    | -3.13919 |          |          |
| ULBP1       | -5.73818             | MAP2K6   | -3.04818 |          |          |
| PACRGL      | -5.73031             | PPP2R1B  | -2.99997 |          |          |
| ERVWE1      | -5.71374             | DDX21    | -2.98607 |          |          |
| NEIL3       | -5.68865             | PTPRD    | -2.94372 |          |          |
| MRS2        | -5.65951             | DDX60    | -2.92042 |          |          |
| RAVER1      | -5.6528              |          |          |          |          |
| STAG1       | -5.62965             |          |          |          |          |

Supplementary Table 4. Association of MTDH with select mRNAs is increased with BEZ 235 (shown are mRNAs pulled-down by MTDH antibody from BEZ-treated cells).

| <b>Gene Symbol</b> | <b>Ratio (mRNA MTDH IP BEZ/<br/>mRNA MTDH IP control)</b> |           |         |
|--------------------|-----------------------------------------------------------|-----------|---------|
|                    |                                                           | EGR1      | 5.83219 |
|                    |                                                           | KIAA1009  | 5.82788 |
| KCNQ5              | 12.3383                                                   | PLEKHO2   | 5.79759 |
| RSPO3              | 11.8322                                                   | CPT2      | 5.77706 |
| SLC38A4            | 10.929                                                    | PRICKLE4  | 5.70704 |
| TBC1D2B            | 9.37971                                                   | SQSTM1    | 5.70667 |
| CENPJ              | 9.23572                                                   | WNK2      | 5.56743 |
| MNT                | 8.61378                                                   | SPEF2     | 5.49133 |
| MRPL39             | 7.97101                                                   | MAP3K12   | 5.45006 |
| CCT4               | 7.9652                                                    | SPRED2    | 5.4444  |
| SLC22A18AS         | 7.76626                                                   | CLMN      | 5.43711 |
| GRID1              | 7.72989                                                   | ANKRD26P1 | 5.4345  |
| IRS2               | 7.15201                                                   | HP1BP3    | 5.33552 |
| CD22               | 7.14514                                                   | ABCC3     | 5.18356 |
| NEB                | 7.10863                                                   | CTGF      | 5.17795 |
| OBSCN              | 7.08271                                                   | PHF16     | 5.16807 |
| ZXDC               | 6.84005                                                   | WDR78     | 5.1489  |
| OR8G5              | 6.70385                                                   | SYNE1     | 5.1485  |
| ZNF559             | 6.5299                                                    | CTGF      | 5.14518 |
| TUBB3              | 6.35006                                                   | PSIP1     | 5.13023 |
| SYNE1              | 6.34444                                                   | COL4A4    | 5.12833 |
| IPO9               | 6.27475                                                   | CARD8     | 5.12567 |
| ESAM               | 6.14151                                                   | EGR1      | 5.11289 |
| FAM184A            | 6.12357                                                   | ICA1L     | 5.10882 |
| AGAP3              | 6.01132                                                   | IL2RB     | 5.10508 |
| WDFY2              | 5.98711                                                   | DMTF1     | 5.08483 |
| DSP                | 5.90057                                                   | DNAH5     | 5.01425 |

Supplementary Table 5. mRNAs that associate with MTDH in response to BEZ235.

| Gene Symbol | MTDH IP<br>BEZ/ control |          |         |         |         |
|-------------|-------------------------|----------|---------|---------|---------|
| CCT4        | 17.6824                 | FN1      | 7.6011  | THBS1   | 6.10022 |
| METTL3      | 13.1633                 | DOPEY2   | 7.44994 | PKN1    | 6.06818 |
| ADCK2       | 13.1461                 | LOXL4    | 7.25585 | AXL     | 6.02808 |
| STXBP1      | 12.5594                 | PLD2     | 7.24358 | MRC2    | 6.00122 |
| CYFIP2      | 12.3147                 | SYNE1    | 7.12225 | PLXNA3  | 5.9912  |
| OBSCN       | 12.3114                 | HSPG2    | 7.11081 | CRIM1   | 5.97827 |
| CUL7        | 12.243                  | ITPR3    | 7.07262 | TENC1   | 5.90554 |
| AGAP3       | 12.161                  | CAPN2    | 7.06472 | CTSB    | 5.88552 |
| MMP2        | 11.7531                 | FLNC     | 7.06392 | FCGRT   | 5.88257 |
| NXF4        | 11.5469                 | TBCD     | 6.96941 | MEGF11  | 5.86673 |
| RYR1        | 11.4929                 | IL17RA   | 6.94854 | CLDN2   | 5.86656 |
| ESAM        | 10.9454                 | FLJ10357 | 6.94183 | RAB24   | 5.85921 |
| FLNA        | 10.824                  | STEAP3   | 6.91527 | ANPEP   | 5.83928 |
| TINAGL1     | 10.5983                 | NPR1     | 6.86481 | EPHB1   | 5.83916 |
| OBSCN       | 10.584                  | PLAT     | 6.77802 | ABTB1   | 5.83009 |
| CD22        | 10.4167                 | PPFIA2   | 6.7256  | SDK1    | 5.81669 |
| C11orf2     | 10.1924                 | SEZ6L2   | 6.7106  | TENC1   | 5.80064 |
| KCNH1       | 9.27805                 | NFKB2    | 6.61153 | HSPG2   | 5.7657  |
| EPHX2       | 9.21181                 | RNF123   | 6.61094 | COL13A1 | 5.7642  |
| VIM         | 9.06607                 | HERC5    | 6.60355 | SPTBN5  | 5.74575 |
| LRP1        | 9.05996                 | CCNDBP1  | 6.58892 | LRIG3   | 5.73658 |
| C11orf2     | 9.02773                 | RIN1     | 6.5688  | MYL5    | 5.73581 |
| COL6A1      | 8.93019                 | EPHX2    | 6.55253 | FAM194B | 5.73267 |
| ITGB5       | 8.90311                 | ACTN1    | 6.51458 | SH2B2   | 5.7166  |
| CRIM1       | 8.47412                 | CYP27A1  | 6.49935 | CDC14B  | 5.7102  |
| ABCC3       | 8.42694                 | DUSP5    | 6.49217 | ANPEP   | 5.69929 |
| GPR124      | 8.37152                 | TEP1     | 6.48857 | THBS1   | 5.69559 |
| TRPC4AP     | 8.22144                 | GRID1    | 6.47752 | MRC2    | 5.69533 |
| RIN1        | 8.19444                 | MLPH     | 6.43776 | MCM6    | 5.69252 |
| HSPG2       | 8.1707                  | TTC15    | 6.41007 | CLCN7   | 5.66976 |
| MLL4        | 7.9759                  | GHDC     | 6.39285 | PLEC    | 5.65909 |
| SSH3        | 7.96339                 | MYH9     | 6.36282 | RNF213  | 5.63485 |
| LAMA5       | 7.91698                 | ARRDC1   | 6.35115 | WDR81   | 5.63224 |
| CTGF        | 7.88025                 | THSD4    | 6.35014 | IKBKB   | 5.61907 |
| STEAP3      | 7.77414                 | TBCD     | 6.2677  | JAG1    | 5.61028 |
| DOCK2       | 7.73778                 | RIPK1    | 6.24573 | STK25   | 5.60992 |
| LDLRAD2     | 7.7347                  | LRP5     | 6.21532 | BCAS3   | 5.60442 |
| ERCC2       | 7.70418                 | SGSM2    | 6.20579 | CUL9    | 5.59638 |
| EGFR        | 7.67947                 | ALOX5    | 6.19131 | NOTCH3  | 5.58937 |
| HACE1       | 7.63202                 | PWP2     | 6.18062 | CYP4V2  | 5.57733 |
|             |                         | ECE1     | 6.17497 | HSPG2   | 5.56929 |
|             |                         | PTHLH    | 6.16107 | TCIRG1  | 5.5547  |
|             |                         |          |         | ARNT2   | 5.54149 |

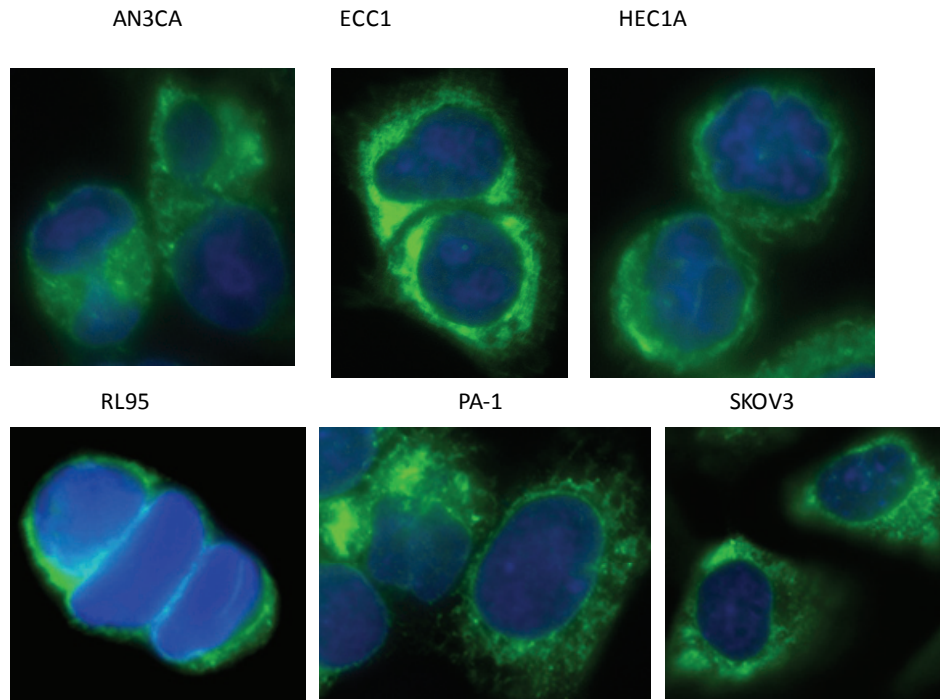

Supplementary Figure 1. Sub-cellular distribution of MTDH was detected by immuno-staining in endometrial cancer cell lines AN3CA, ECC1, Hec1A, and RL95 and ovarian cancer cell lines PA-1 and SKOV3.



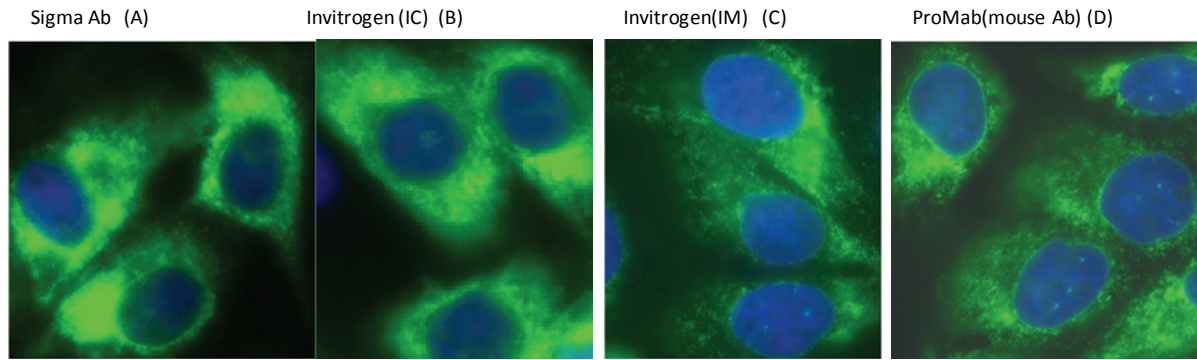

Supplementary Figure 2. Sub-cellular localization of MTDH was detected by MTDH antibodies including rabbit Abs against MTDH 315-461 from Sigma (A), MTDH internal region (B), and C-terminal region from Invitrogen (C), and mouse anti-MTDH antibody 2F11C3 from ProMab (D).

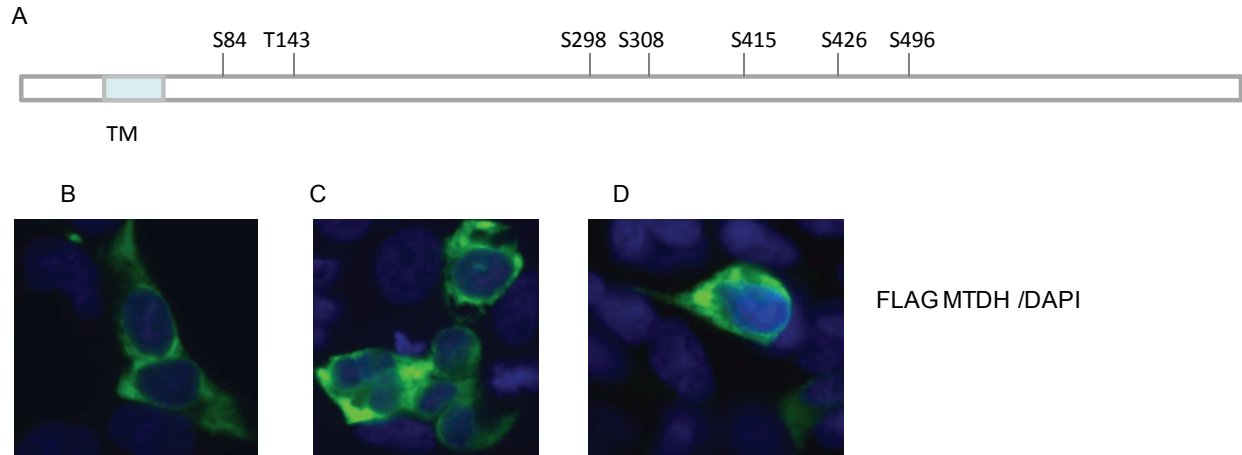

Supplementary Figure 3. Mutation of kinase phosphorylation sites in MTDH did not alter MTDH sub-cellular distribution. (A) Schematic representation of MTDH highlighting the different phosphorylation sites. Sub-cellular distribution of FLAG tagged MTDH mutated at T143A, S415A, S84A, S308A (B), MTDH mutated at S298A S496A S426A (C), or MTDH mutated at S84A T143A (D) was detected by immuno-staining with FLAG antibody. Several phospho-proteomic studies have identified MTDH phosphorylation on seven sites (S84, T143, S298, S308, S415, S426, and S496). All the seven phosphorylation sites of MTDH have been confirmed in mammalian cells. The data can be found in the following two websites and the following references: <http://www.phosphonet.ca/> ; <http://www.phosphosite.org/> ; T143: Dephoure et al. PNAS 2008, 105:10762; S298: Villén et al. PNAS 2007, 104:1488; S84, S308, S415, S426: Olsen et al. Cell 2006, 127:635; S496: Olsen et al. Sci Signal 2010, 3:ra3.

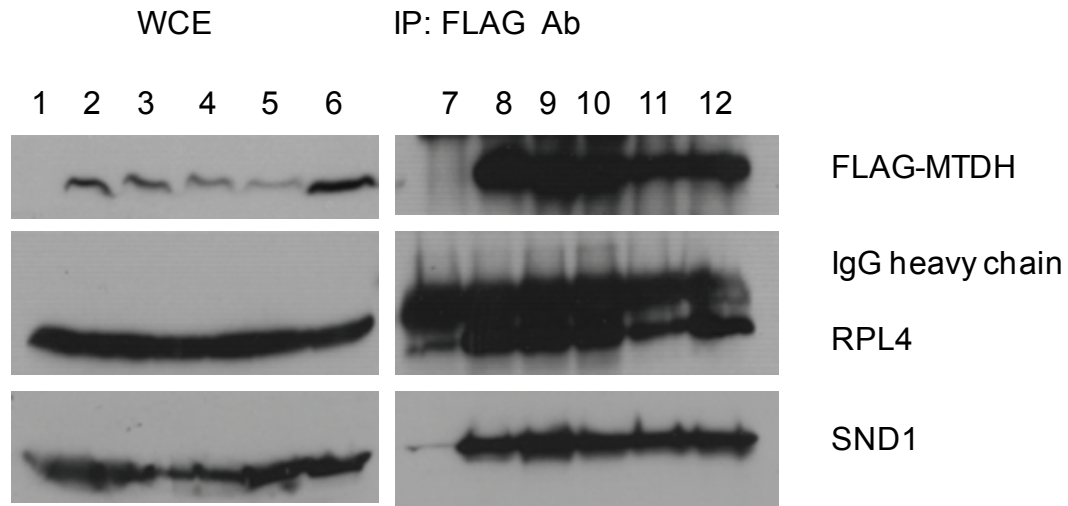

Supplementary Figure 4. Mutation of known phosphorylation sites in MTDH to alanine did not disrupt MTDH association with cytoplasmic proteins SND1 and RPL4. Left panel: Expression of FLAG-tagged MTDH, RPL4, and SND1 in whole cell protein extracts (WCE). Right panel: Immunoprecipitation with FLAG antibody M2. Lanes 1,7: control Hec50; lanes 6,12: Hec50 cells expressing wild-type FLAG-MTDH; lanes 2, 8: MTDH mutated at T143A,S415A, S84A, S308A; lanes 3, 9: MTDH mutated at S298A S496A S426A; lanes 4, 10: MTDH mutated at S84AT143A; and lanes 5, 11: MTDH mutated at S78A(5,11).

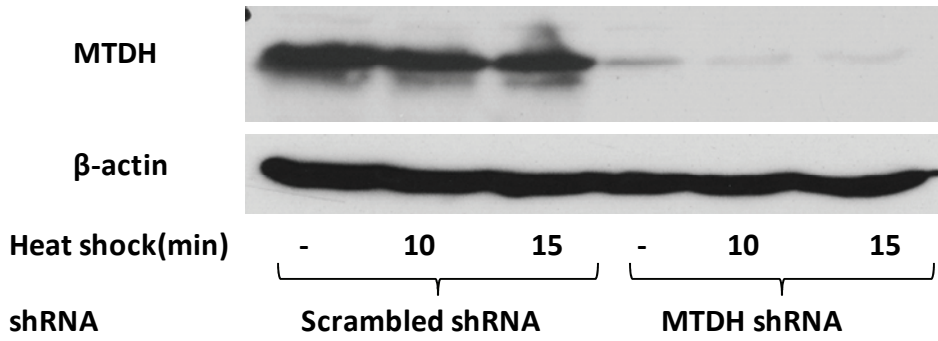

Supplementary Figure 5. Heat shock does not alter MTDH protein levels. Expression of MTDH was detected at control or 10min/15min after heat shock in scrambled shRNA and MTDH shRNA expressing cells.

GENE ID: 1443290 leuS | leucyl-tRNA synthetase

|      |     |                                                              |     |
|------|-----|--------------------------------------------------------------|-----|
| MTDH | 92  | AAAVPAAAPDDLALLKNLRSEEQKKKNRKKLSEKPKPNGRTVE-VAEGEAVRTPQSVTAK | 150 |
|      |     | +VPA AP D L++L+ E + + EK + R VE + ++                         |     |
| leuS | 322 | VMSVPAHAPFDHVALEDLKRETE-----ILEKYDIDPRIVENITYISLIKLEGYGDFP   | 374 |
| MTDH | 151 | QPPEIDKKNEKSKKNKKKSKSDAKAVQNSSRHG                            | 184 |
|      |     | E++K KS+K+K+K + K + + H G                                    |     |
| leuS | 375 | AVEEVNKLGIKSQKDKLEQATKTIYKAEYHKG                             | 408 |

Supplementary Figure 6. MTDH is homologous to leucyl- tRNA synthetase. BLAST was used to identify regions of MTDH that possessed homology with other proteins.



Sequence: STEPSVILSKSDSDKSSSQVPPILQETDKSKSNTKQNSVPPSQTKSETSWESPKQIK  
 Prediction: -----++-+++-----++++++-+-++++-----++-+  
 Confidence: 013316461871898800173489331089999998072707899710003217719

Sequence: KKKKARRET  
 Prediction: ++++++--  
 Confidence: 99999911

\*\*\* Prediction: binding residues are labeled with '+' and in red;  
 non-binding residues labeled with '-' and in green.  
 \*\*\* Confidence: from level 0 (lowest) to level 9 (highest).

### PIRaNha Prediction Result

( <http://bioinformatics.sussex.ac.uk/PIRANHA/> )

0001 - 0050 : MAARSWQDEL AQAEEGSAR LREMLSVGLG FLRTELGLDL GLEPKRYPGW  
 0051 - 0100 : VILVGTGALG LLLLFLLGYG WAAACAGARK KRRSPPRKRE EAAAVPAAAP  
 0101 - 0150 : DDLALLKNLR SEEQKKNRK KLSEKPKPNG RTVEVAEGEA VRTPQSVTAK  
 0151 - 0200 : QPPEIDKNE KS~~KKN~~KKKSK SDAKAVQNSS RHDGKEVDEG AWETKISHRE  
 0201 - 0250 : KRQQRRDKV LTDSGSLDST IPGIENTITV TTEQLTTASF PVGSKKNKGD  
 0251 - 0300 : SHLNVQVS NF KSGKGDSTLQ VSSGLNENLT VNGGGWNEKS VKLSSQISAG  
 0301 - 0350 : EEKWSVSPA SAGKRKTEPS AWSQDTGDAN TNGKDWGRSW SDRSIFSGIG  
 0351 - 0400 : STAEPVSQST TSDYQWDVSR NQPYIDDEWS GLNGLSSADP NSDWNAPAE  
 0401 - 0450 : WGNWVDEERA SLLKSQEPIP DDQKVSDDDK EKGEALPTG KSKKKKKKKK  
 0451 - 0500 : KQGEDNSTAQ DTEELEKEIR EDLPVNTSKT RPKQEKAFLS KTISTSDPAE  
 0501 - 0550 : VLVKNSQPIK TLPPATSTEP SVILSKSDSD KSSSQVPPIL QETDKSKSNT  
 0551 - 0600 : QNSVPPSQT KSETSWESPK QIKKKKARR ET

Hec50/ MTDH shRNA MTDH (1-582)

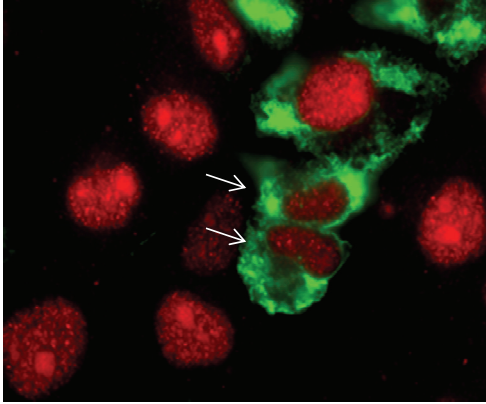

Hec50/ MTDH shRNA MTDH (1-471)

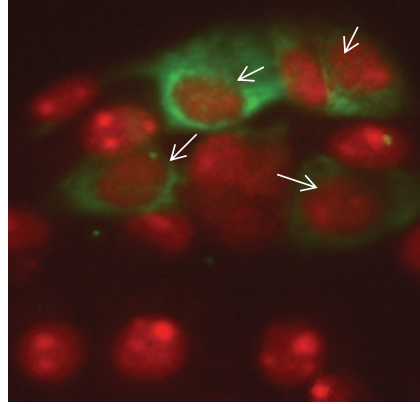

Hec50/ MTDH shRNA MTDH (1-300)

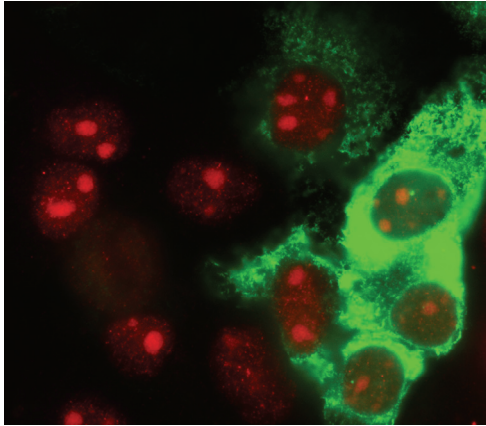

Hec50/ MTDH shRNA MTDH (471-582)

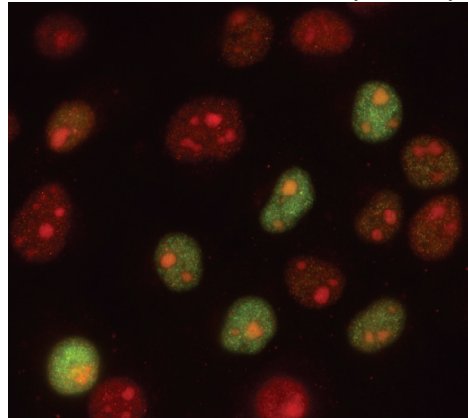

Supplementary Figure 8. Effect of exogenous expression of MTDH on nuclear accumulation of Rad51 in MTDH-depleted cells. Transient expression of exogenous full length MTDH or MTDH fragment (1-471) caused the reduction of Rad51 specific accumulation in the nuclei (marked by arrows). Transient exogenous expression of MTDH (1-300) and MTDH (471-582) did not affect Rad51 accumulation in the nuclei. MTDH: green; Rad51: red.
